# Supplementary material
Source: Springer Nature journal article supplement (https://www.springermedizin.de/resource/supplementary/12990_2013_590_MOESM6_ESM.pdf/9613580)

### A Audible vocalizations

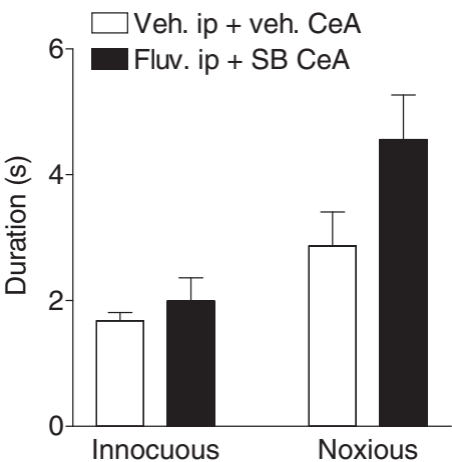

### B Ultrasonic vocalizations

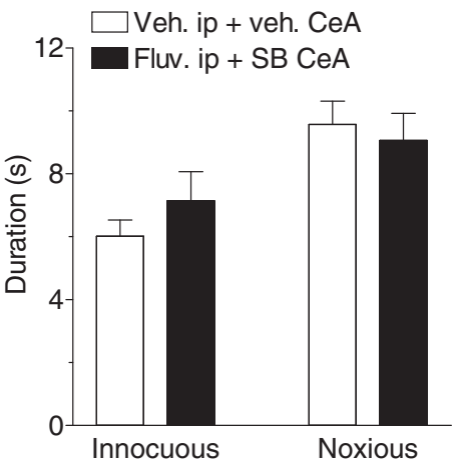

### C Spinal reflexes

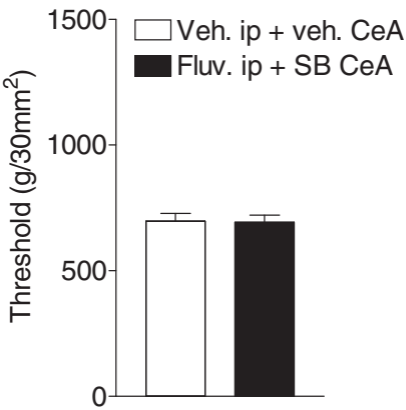

Supplement: MOESM6 [file 9613580]
